# Supplementary material for: Construction and characterization of an inorganic–organic hybrid copper(i) iodide coordination polymer with semiconducting luminescence
Source: Royal Society of Chemistry journal article supplement (doi:10.1039/d4nj01779j), 2024-01-01
Supplement: d4nj01779j1.pdf [file d4nj01779j1.pdf]

# Construction and characterization of an inorganic-organic hybrid copper(I) iodide coordination polymer with the semiconducting luminescence

Hui Yang,<sup>abcd</sup> Xiaofei Kuang,<sup>\*abcd</sup> Ying-Hao Mi,<sup>ac</sup> Ming-Ming Wang,<sup>ac</sup> Yuqing Zhao,<sup>ad</sup> Fulin Lin<sup>ac</sup> and Can-Zhong Lu<sup>\*abcd</sup>

*a. State Key Laboratory of Structural Chemistry, Fujian Institute of Research on the Structure of Matter, Chinese Academy of Sciences, Fuzhou, Fujian 350002, China.*

*E-mail: xfkuang@fjirsm.ac.cn, czlu@fjirsm.ac.cn*

*b. College of Chemistry and Materials Science, Fujian Normal University, Fuzhou 350007, China.*

*c. Xiamen Key Laboratory of Rare Earth Photoelectric Functional Materials, Xiamen Institute of Rare Earth Materials, Haixi Institutes, Chinese Academy of Sciences, Xiamen 361021, China.*

*d. Fujian College, University of Chinese Academy of Sciences, Fuzhou, Fujian 350002, China.*

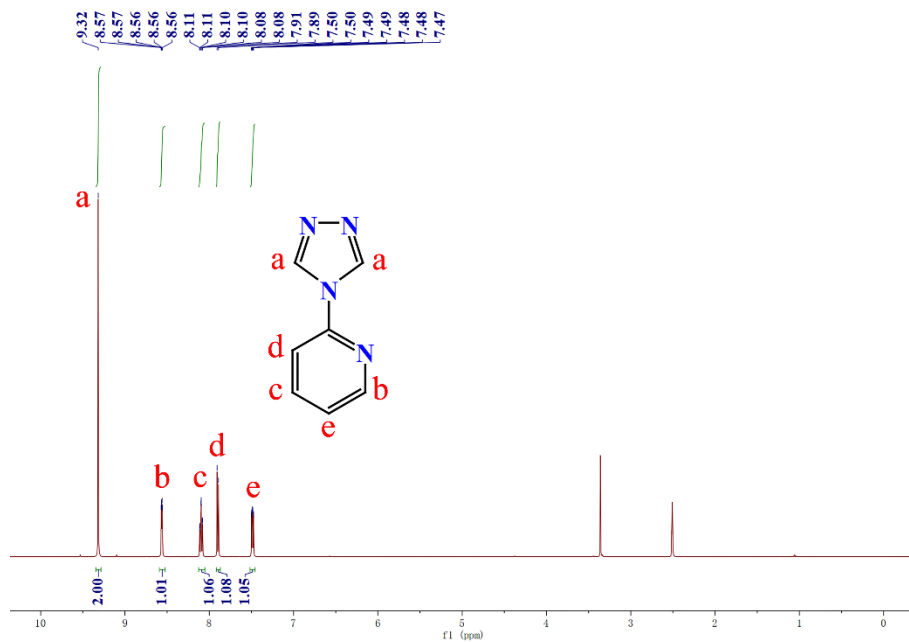

Fig. S1. The  $^1\text{H}$  NMR spectrum of Pytz in  $\text{DMSO-}d_6$ .

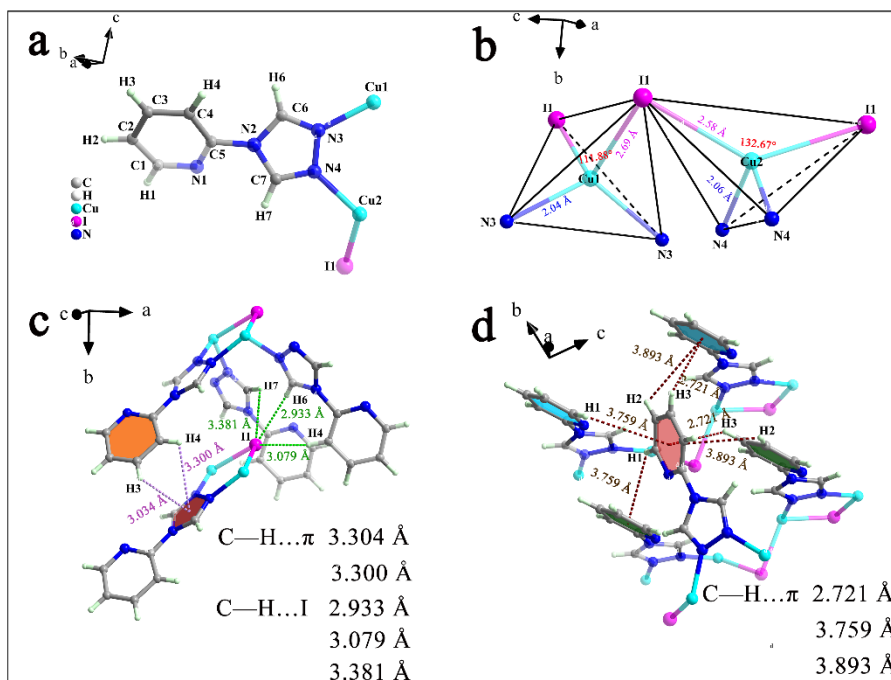

Fig. S2. (a) The asymmetric unit of  $\text{CuI-Pytz}$ . (b) The distorted tetrahedrons of  $\text{CuI-Pytz}$ . (c) and (d) The illustration of the  $\text{C-H}\dots\pi$  and  $\text{C-H}\dots\text{I}$  interactions stabilizing the supramolecular structure.

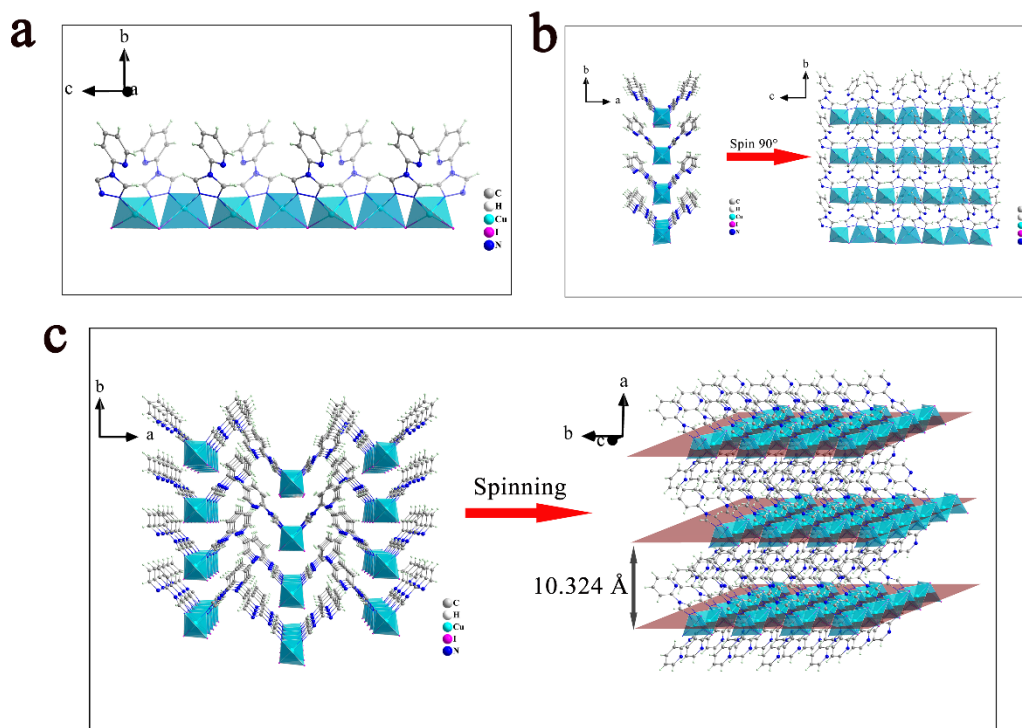

Fig. S3. (a) 1D chain of CuI-Pytz. (b) 2D layer of CuI-Pytz. (c) 3D structure of CuI-Pytz.

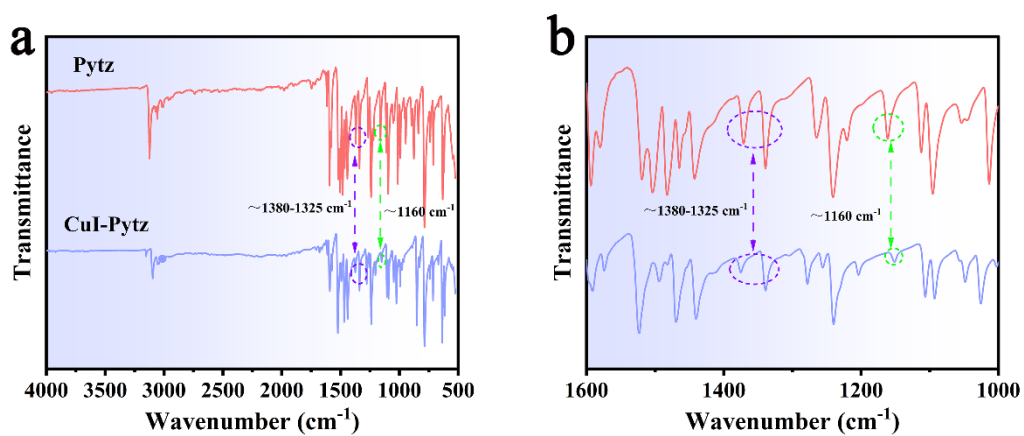

Fig. S4. (a) FT-IR spectra of Pytz and CuI-Pytz. (b) The fine structure of IR spectra.

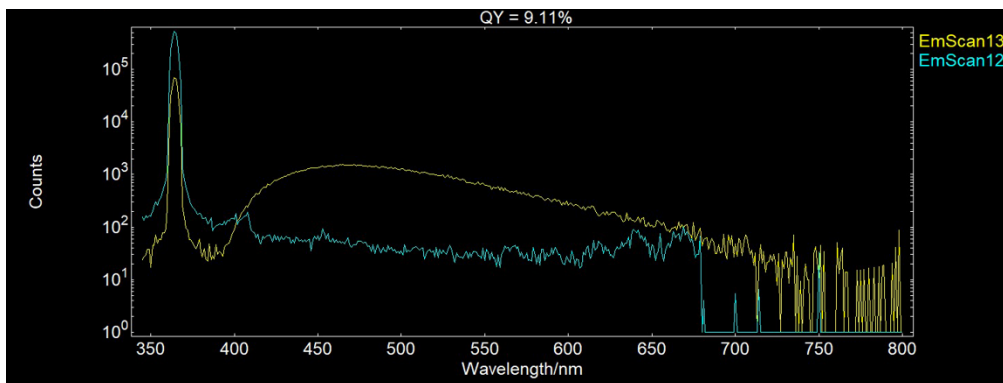

Fig. S5. The PL quantum yield ( $\Phi_{\text{PL}}$ ) of CuI-Pytz under 365 nm excitation light.

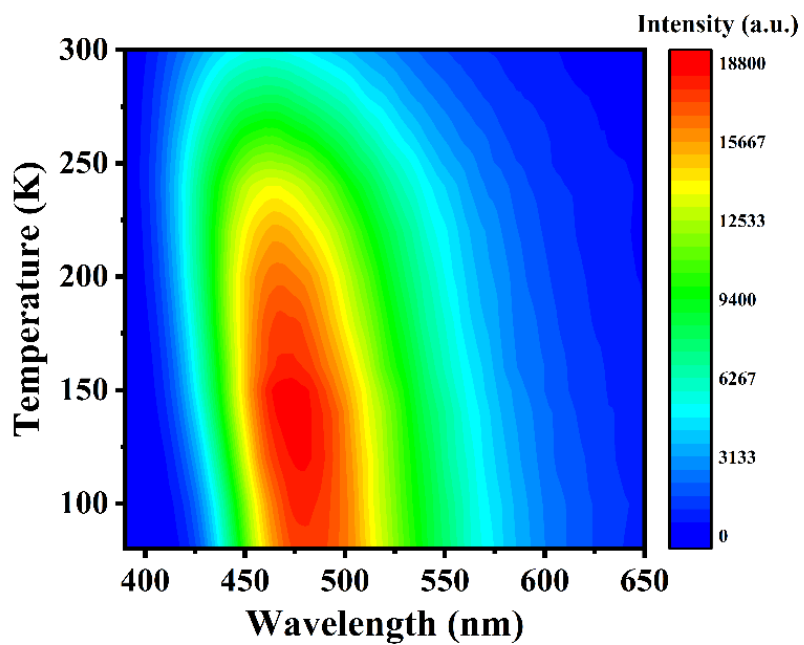

Fig. S6. Temperature and PL emission 2D contour mapping.

Table S1. Selected bond lengths (Å) and bond angles (°) for **CuI-Pytz**.

|                                      |           |                                      |            |
|--------------------------------------|-----------|--------------------------------------|------------|
| Cu1—I1 <sup>1</sup>                  | 2.6879(4) | N3 <sup>3</sup> —Cu1—I1 <sup>1</sup> | 117.04(8)  |
| Cu1—I1 <sup>2</sup>                  | 2.6879(4) | N3—Cu1—I1 <sup>1</sup>               | 99.51(8)   |
| Cu1—N3                               | 2.042(3)  | N3—Cu1—I1 <sup>2</sup>               | 117.04(8)  |
| Cu1—N3 <sup>3</sup>                  | 2.041(3)  | N3 <sup>3</sup> —Cu1—N3              | 112.81(16) |
| Cu2—I1                               | 2.5809(3) | I1 <sup>1</sup> —Cu2—I1              | 132.67(3)  |
| Cu2—I1 <sup>2</sup>                  | 2.5809(3) | N4 <sup>1</sup> —Cu2—I1              | 100.09(8)  |
| Cu2—N4                               | 2.059(3)  | N4 <sup>1</sup> —Cu2—I1 <sup>1</sup> | 109.72(8)  |
| Cu2—N4 <sup>2</sup>                  | 2.059(3)  | N4—Cu2—I1                            | 109.72(8)  |
| I1 <sup>1</sup> —Cu1—I1 <sup>2</sup> | 111.88(2) | N4—Cu2—I1 <sup>1</sup>               | 100.09(8)  |
| N3 <sup>3</sup> —Cu1—I1 <sup>2</sup> | 99.51(8)  | N4—Cu2—N4 <sup>1</sup>               | 100.66(16) |

Symmetry codes: <sup>1</sup>+X, +Y, 1+Z; <sup>2</sup>1-X, +Y, 1-Z; <sup>3</sup>1-X, +Y, 2-Z (Bond lengths).

<sup>1</sup>1-X, +Y, 1-Z; <sup>2</sup>+X, +Y, 1+Z; <sup>3</sup>1-X, +Y, 2-Z; <sup>4</sup>+X, +Y, -1+Z (Bond angles).

Table S2. Temperature-dependent lifetime values of **CuI-Pytz**.

| Temp (K) | A <sub>1</sub> | τ <sub>1</sub> (μs) | A <sub>2</sub> | τ <sub>2</sub> (μs) | τ <sub>ave</sub> (μs) |
|----------|----------------|---------------------|----------------|---------------------|-----------------------|
| 80       | 0.684 (50%)    | 24.500              | 0.684 (50%)    | 29.945              | 27.495                |
| 100      | 0.699 (50%)    | 21.439              | 0.699 (50%)    | 26.203              | 24.059                |
| 120      | 0.741 (50%)    | 17.902              | 0.741 (50%)    | 21.880              | 20.089                |
| 140      | 0.864 (50%)    | 14.059              | 0.864 (50%)    | 17.183              | 15.777                |
| 160      | 0.982 (50%)    | 11.054              | 0.982 (50%)    | 13.510              | 12.405                |
| 180      | 0.800 (50%)    | 9.880               | 0.800 (50%)    | 12.075              | 11.087                |
| 200      | 0.290 (30.8%)  | 3.033               | 0.651 (69.2%)  | 7.382               | 6.709                 |
| 220      | 0.340 (36.4%)  | 1.972               | 0.594 (63.6%)  | 5.587               | 4.980                 |
| 240      | 0.386 (40.8%)  | 1.603               | 0.561 (59.2%)  | 4.431               | 3.868                 |
| 260      | 0.403 (43.2%)  | 1.058               | 0.529 (56.8%)  | 3.219               | 2.786                 |
| 280      | 0.367 (39.2%)  | 0.623               | 0.569 (60.8%)  | 2.141               | 1.901                 |
| 300      | 0.379 (41.2%)  | 0.381               | 0.541 (58.8%)  | 1.310               | 1.153                 |
